# Supplementary material for: Identification and in vitro enzymatic activity analysis of the AOP2 gene family associated with glucosinolate biosynthesis in Tumorous stem mustard (Brassica juncea var. tumida)
Source: Front Plant Sci. 2023 Feb 22;14:1111418. doi: 10.3389/fpls.2023.1111418 (PMC9992552; doi:10.3389/fpls.2023.1111418)
Supplement: Supplementary file 1 [file Table_1.xlsx]

## Sheet: Table S1
Table S1 Primer sequences of BjuAOP2genes used in coding sequences cloning and subcellular localization vector construction
Gene ID	Primer sequence( 5’-3’)
BjuAOP2.1F+ XmaI	TGCGGCAGCGGCCGAATTCCCCGGGATGGGTTCAGACAGTACTCCT
BjuAOP2.1R+ BamHI	CAGTTATCTAGATCCGGTGGATCCTCATGCTTCGGAGACGGC
BjuAOP2.2F+ XmaI	TGCGGCAGCGGCCGAATTCCCCGGGATGGGTGCAGACACTCCTCA
BjuAOP2.2R+ BamHI	CAGTTATCTAGATCCGGTGGATCCTTATGCTCCAGAGACGGC
BjuAOP2.3F+ XmaI	TGCGGCAGCGGCCGAATTCCCCGGGATGGGTTCAGACAGTA
BjuAOP2.3R+ BamHI	CAGTTATCTAGATCCGGTGGATCCTCATGCTTCAGAGACGG
BjuAOP2.4F+ XmaI	TGCGGCAGCGGCCGAATTCCCCGGGATGTCTATAAATTGGGCATTC
BjuAOP2.4R+ BamHI	CAGTTATCTAGATCCGGTGGATCCTTATGCTCCAGAGACAG
BjuAOP2.5F+ XmaI	TGCGGCAGCGGCCGAATTCCCCGGGATGGGTTCAGACAGTACTCCT
BjuAOP2.5R+ BamHI	CAGTTATCTAGATCCGGTGGATCCTTAAGCTCCGGAGACGGCA
The nucleotide sequences of restriction endonuclease sites are underlined.

## Sheet: Table S2
Table S2 Primer sequences of BjuAOP2genes used heterologous expression vector construction
Gene ID	Primer sequence( 5’-3’）
BjuAOP2.1(BjuVB05G45660)F+ NcoI	ACCGACGACGACGACAAGGCCATGGCGATGGGTTCAGACAGTACTCCT
BjuAOP2.1(BjuVB05G45660)R+ XhoI	GTGGTGGTGGTGGTGGTGCTCGAGTCATGCTTCGGAGACGGC
BjuAOP2.2(BjuVA09G02070)F+ NcoI	ACCGACGACGACGACAAGGCCATGGCGATGGGTGCAGACACTCCTCA
BjuAOP2.2(BjuVA09G02070)R+ XhoI	GTGGTGGTGGTGGTGGTGCTCGAGTTATGCTCCAGAGACGGC
BjuAOP2.3(BjuVA02G29850)F+ NcoI	ATACCATGGCGATGGGTTCAGACAGTA
BjuAOP2.3(BjuVA02G29850)R+ XhoI	ATACTCGAGTCATGCTTCAGAGACGG
BjuAOP2.4(BjuVB08G37450)F+ NcoI	ACCGACGACGACGACAAGGCCATGGCGATGTCTATAAATTGGGCATTC
BjuAOP2.4(BjuVB08G37450)R+ XhoI	GTGGTGGTGGTGGTGGTGCTCGAGTTATGCTCCAGAGACAG
BjuAOP2.5(BjuVA03G30000)F+ NcoI	ACCGACGACGACGACAAGGCCATGGCGATGGGTTCAGACAGTACTCCT
BjuAOP2.5(BjuVA03G30000)R+ XhoI	GTGGTGGTGGTGGTGGTGCTCGAGTTAAGCTCCGGAGACGGCA
The nucleotide sequences of restriction endonuclease sites are underlined.

## Sheet: Table S3
Table S3 Primer sequences of the BjuAOP2 and ACTIN genes used in the qRT-PCR analysis
Gene ID	Primer sequence( 5’-3’)
BjuAOP2.1F	TCTTTCGTTGTTATGGC
BjuAOP2.1R	GATGTTACCTGCGTTTG
BjuAOP2.2F	CGGAAAGAAAGAAGACA
BjuAOP2.2R	CAATAAGCGTGAAGAGTAG
BjuAOP2.3F	CTGGATTGTTTCGCTGA
BjuAOP2.3R	ACCCTACACTGGATACTCG
BjuAOP2.4F	TCAGGAGTGGTGTCCGTAA
BjuAOP2.4R	GGGCGTAGCAGTTGAGTAA
BjuAOP2.5F	TAGGCTTACCTTCTCATAC
BjuAOP2.5R	TTTCTCCGTCACTCTTAC
ACTINF	CGAAACAACTTACAACTCCA
ACTINR	CTCTTTGCTCATACGGTCA

## Sheet: Table S4
Table S4 AOP genes identified in 19 Brassicaceae species in the Brassica Database
Species	Gene ID			Reference
Arabis alpina	AaAOP1(Aa_G189150.t1)			(Jiao et al., 2017）
Arabis alpina	AaAOP2(Aa_G189140.t1)			(Jiao et al., 2017）
Arabidopsis lyrata	AlAOP1.1(AL3G46690.t1.v2.1)			(Hu et al., 2011)
Arabidopsis lyrata	AlAOP1.2(AL6G49880.t1.v2.1)			(Hu et al., 2011)
Arabidopsis lyrata	AlAOP2(AL6G49890.t1.v2.1)			(Hu et al., 2011)
Arabidopsis thaliana	AtAOP1(AT4G03070.1)			The Arabidopsis Genome Initiative
Arabidopsis thaliana	AtAOP2(AT4G03060.1)			The Arabidopsis Genome Initiative
Arabidopsis thaliana	AtAOP3(AT4G03050.1)			The Arabidopsis Genome Initiative
Brassica carinata	BcAOP1.1(BcaB01g01938)			(Song et al.,2021)
Brassica carinata	BcAOP1.2(BcaB01g01984)			(Song et al.,2021)
Brassica carinata	BcAOP1.3(BcaB01g02502)			(Song et al.,2021)
Brassica carinata	BcAOP1.4(BcaC01g06710)			(Song et al.,2021)
Brassica carinata	BcAOP1.5(BcaC01g06711)			(Song et al.,2021)
Brassica carinata	BcAOP2.1(BcaB01g01935)			(Song et al.,2021)
Brassica carinata	BcAOP2.2(BcaB01g01986)			(Song et al.,2021)
Brassica carinata	BcAOP2.3(BcaC01g06712)			(Song et al.,2021)
Brassica carinata	BcAOP2.4(BcaC03g16194)			(Song et al.,2021)
Brassica juncea	BjuAOP1.1(BjuVA09G02080.1)			(Yang et al., 2021)
Brassica juncea	BjuAOP1.2(BjuVA09G02090.1)			(Yang et al., 2021)
Brassica juncea	BjuAOP1.3(BjuVB08G37470.1)			(Yang et al., 2021)
Brassica juncea	BjuAOP1.4(BjuVA03G29990.1)			(Yang et al., 2021)
Brassica juncea	BjuAOP1.5(BjuVB08G31970.1)			(Yang et al., 2021)
Brassica juncea	BjuAOP2.1(BjuVB05G45660.1)			(Yang et al., 2021)
Brassica juncea	BjuAOP2.2(BjuVA09G02070.1)			(Yang et al., 2021)
Brassica juncea	BjuAOP2.3(BjuVA02G29850.1)			(Yang et al., 2021)
Brassica juncea	BjuAOP2.4(BjuVB08G37450.1)			(Yang et al., 2021)
Brassica juncea	BjuAOP2.5(BjuVA03G30000.1)			(Yang et al., 2021)
Brassica napus	BnAOP1.1(BnaC03g30410D)			(Boulos Chalhoub et al., 2014)
Brassica napus	BnAOP1.2(BnaC09g00440D)			(Boulos Chalhoub et al., 2014)
Brassica napus	BnAOP1.3(BnaA09g01280D)			(Boulos Chalhoub et al., 2014)
Brassica napus	BnAOP1.4(BnaC09g00430D)			(Boulos Chalhoub et al., 2014)
Brassica napus	BnAOP1.5(BnaA09g01270D)			(Boulos Chalhoub et al., 2014)
Brassica napus	BnAOP2.1(BnaC09g00410D)			(Boulos Chalhoub et al., 2014)
Brassica napus	BnAOP2.2(BnaA09g01260D)			(Boulos Chalhoub et al., 2014)
Brassica napus	BnAOP2.3(BnaA02g20860D)			(Boulos Chalhoub et al., 2014)
Brassica nigra	BniAOP1(BniB044991-TA)			(Yang et al., 2016)
Brassica oleracea	BoAOP1(Boc03g04024.1)			(Lv et al., 2020)
Brassica oleracea	BoAOP2.1(Boc02g01563.1)			(Lv et al., 2020)
Brassica oleracea	BoAOP2.2(Boc09g00227.1)			(Lv et al., 2020)
Brassica rapa	BrAOP1.1(BraA03g028730.3C)			(Zhang et al., 2018)
Brassica rapa	BrAOP1.2(BraA09g001270.3C)			(Zhang et al., 2018)
Brassica rapa	BrAOP1.3(BraA09g001280.3C)			(Zhang et al., 2018)
Brassica rapa	BrAOP2.1(BraA03g028740.3C)			(Zhang et al., 2018)
Brassica rapa	BrAOP2.2(BraA02g027370.3C)			(Zhang et al., 2018)
Brassica rapa	BrAOP2.3(BraA09g001290.3C)			(Zhang et al., 2018)
Boechera stricta	BsAOP2(Bostr.0124s0070.1.v1.2)			(Lee et al., 2017)
Capsella grandiflora	CgAOP1(Cagra.2552s0022.1.v1.1)			(Slotte et al., 2013)
Capsella grandiflora	CgAOP2(Cagra.2552s0023.1.v1.1)			(Slotte et al., 2013)
Cardamine hirsuta	ChAOP1(CARHR251490.1)			(Gan et al., 2016)
Cardamine hirsuta	ChAOP2(CARHR251430.1)			(Gan et al., 2016)
Capsella rubella	CrAOP1(Carub.0006s3400.1.v1.1)			(Slotte et al., 2013)
Capsella rubella	CrAOP3(Carub.0006s3401.1.v1.1)			(Slotte et al., 2013)
Camelina sativa	CsAOP1(Csa08g050250.1)			(Kagale et al., 2014)
Eutrema salsugineum	EsAOP1(Thhalv10028799m.v1.0)			(Yang et al., 2013)
Eutrema salsugineum	EsAOP2(Thhalv10028690m.v1.0)			(Yang et al., 2013)
Lepidium meyenii	LmAOP1(evm.model.scaffold216.712)			(Zhang et al., 2016)
Microthlaspi erraticum	MeAOP1(rna-MERR_LOCUS34302)			(Mishra et al., 2020)
Microthlaspi erraticum	MeAOP3(rna-MERR_LOCUS995)			(Mishra et al., 2020)
Raphanus sativus	RsAOP1(Rs478720.1)			(Jeong et al., 2016)
Thlaspi arvense	TaAOP1(Thlar.0023s0241.1.v1.1)			(Dorn et al., 2015)
Thlaspi arvense	TaAOP2(Thlar.0023s0238.1.v1.1)			(Dorn et al., 2015)

## Sheet: Table S5
Table S5 The sequence of motifs AOP identified by MEME
Motif	Width	Best possible match
1	41	PKELVDEKHPRVFKPFTYVDLMSFYHTEAGRRARSTLHAYC
2	35	SHTDKNIITILHQYQVDGLEIMTKDEKWIKVKPSQ
3	35	ETIHKFSEQLSELDVMVRRMIMESFGIEKYIDEHL
4	36	DQNLTPGTSKWDEVKADVRKALEDYGCFQAFVDKVS
5	29	SVFEAMEELFDLPVQTKQRNVSSKPFHGY
6	29	HSFIIMVGDSLCAFLNGRLSSPYHRVRMT
7	29	HNLYQSLGIDDANVLEKVNDFTQQIWPDH
8	21	KKTRYSTALFSIPKPGVIIDS
9	21	NSTNYLFRMMKYTAPPDDDVE
10	11	DSIQLPVIDFS
11	29	TRTSATVGVSDSVKANGGADDEEKKLGLP
12	29	ANADAGDIANGIAKVHIDDDANAKGDVCT
13	29	DVNTGDCANVKSNVDVGTNVSAKSSVGAD
14	6	GNKSIS
15	8	MDSDSLLP

## Sheet: Table S6
Table S6 Summary of various cis-regulatory elements present within 2 kb upstream region of AOP homologs, obtained using PLACE database
Gene ID	cell cycle regulation	circadian control	low-temperature responsiveness	MeJA-responsiveness	meristem expression	salicylic acid responsiveness	zein metabolism regulation	abscisic acid responsiveness	anaerobic induction	auxin-responsive element	defense and stress responsiveness	differentiation of the palisade mesophyll cells	endosperm expression	gibberellin-responsive element	light responsive element	MYB binding site	root specific regulation	seed-specific regulation	wound-responsive element
AaAOP2		1	1	4	2	2			4	1		1		1	11	1		1
AaAOP1		1	1	4	2	1			4	1		1		1	14	2
AlAOP1.1		1	1	2	1	1		2	2	2				1	15	1	1
AlAOP1.2				6	3	1			2					2	18	1		1
AlAOP2			1	2		2	1	4	3		1			2	16	1
AtAOP3		1			1				2		1		1		10	1		1
AtAOP2								3	1		1			1	12	1
AtAOP1			1					1	2	1		1		1	11	1
BcAOP2.1				4	2		1	1		1					7	2
BcAOP1.1				2		1	1	2	4					2	10	1
BcAOP1.2				14				6	5		2			1	13	3
BcAOP2.2		1	2	2	1	1		4	2		1				10	1
BcAOP1.3				2		1		4	3	1					12	4
BcAOP1.4			2	4		1		3	3	3	1		1	1	16	1
BcAOP1.5			1	2				2	1	2					12
BcAOP2.3	1		1					10	2	1	1				22	2
BcAOP2.4				2			1	3	3					2	15	1
BjuAOP2.3	1			6			2	5	5	1				3	11	2
BjuAOP1.4			1	4	1	2	1	2		1	2	1		1	12
BjuAOP2.5	1					1	1	5	3	1					18	1
BjuAOP2.2			3		1		2	6	2	1	1				6
BjuAOP1.1			4		1		2	5	3	1	1				6	1
BjuAOP1.2				8				4	4			1		2	7	2
BjuAOP2.1	1			8			3	4	2	2				3	8	1
BjuAOP1.5				2		1		4	3	1					11	4
BjuAOP2.4				4	2		1	1		1					8	1
BjuAOP1.3			1	2		1	1	2	3					2	10	1
BnAOP2.3	1			6			2	5	5	1				3	11	2
BnAOP2.2			3		1		1	6	2	1	1				6
BnAOP1.5			4		2			5	3	1	1				7	1
BnAOP1.3				8				4	4			1		1	7	2
BnAOP1.1		1	3	2			1	6	4	1					19
BnAOP2.1		2	2			1		7	3	1				1	15	1	1		1
BnAOP1.4			1	2	1			4	1	1	1			1	8
BnAOP1.2				14				6	4		1			2	12	3
BniAOP1			1	2		1	1	2	3					2	10	1
BoAOP2.1	1	1	1	4	1		2	6	5	1				2	13	2
BoAOP1		1	1				1	5	4	1					18
BoAOP2.2		1	2			3		2	1		1			1	15	1
BsAOP2				2	1		1		6	2	1				9
BrAOP2.2	1			6			2	5	5	1				3	11	2
BrAOP1.1			1	6	1	2	1	2		1	2	1		1	12
BrAOP2.1	1		2					3	4	1					9	2
BrAOP1.2				8				4	4			1		2	7	2
BrAOP1.3			4		1		2	6	3	1	1				6	1
BrAOP2.3			3		1		2	7	2	1	1				6
CgAOP1				2					2		2	1	1	1	6	2
CgAOP2				2				2	2		1	1	1	1	8	2
ChAOP2				4					2	1	1			1	10	1		1
ChAOP1.2			1	4		1			3						9
CrAOP1				4			1		2		1	1		2	6	1
CrAOP3				4			1	2	2		1			1	11	1
CsAOP1				2				1	10	1	2	1			3	4
LmAOP1				4	2		1	5	3		1	1		1	8	1
MeAOP1		1	1	2	2			5	2					1	21	1
MeAOP3			1	4	1		1		5		1				8
RsAOP1			2	2				3			1				18
EsAOP2		1				1		1	3	2					9	1
EsAOP1				2		1	3	2	4						13
TaAOP2				2	2	1		2	1	1					16	2
TaAOP1		1	2	2			1	3	2	2	1			1	8	1
